# Supplementary material for: The 2.8 Å Electron Microscopy Structure of Adeno-Associated Virus-DJ Bound by a Heparinoid Pentasaccharide
Source: PubMed Central journal article supplement — Mol Ther Methods Clin Dev. 2017 Mar 8;5:1–12. doi: 10.1016/j.omtm.2017.02.004 (PMC5415311; doi:10.1016/j.omtm.2017.02.004), 2017-03-08
Supplement: mmc1.pdf [file mmc1.pdf]

**OMTM, Volume 5**

**Supplemental Information**

**The 2.8 Å Electron Microscopy Structure  
of Adeno-Associated Virus-DJ Bound  
by a Heparinoid Pentasaccharide**

**Qing Xie, John M. Spear, Alex J. Noble, Duncan R. Sousa, Nancy L. Meyer, Omar Davulcu, Fuming Zhang, Robert J. Linhardt, Scott M. Stagg, and Michael S. Chapman**

## Supplemental Figures

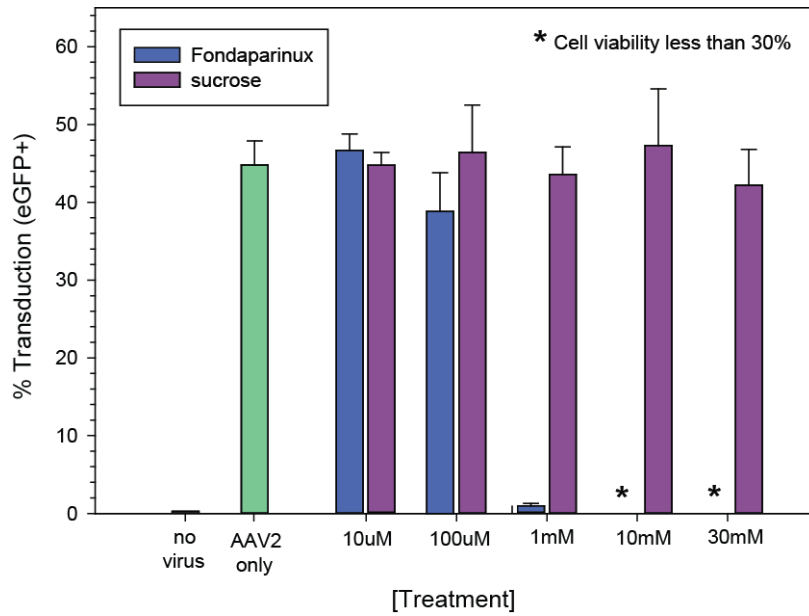

Figure S1: Controls for the transduction inhibition assay (Figure 2). Transduction in HeLa cells was measured using an eGFP-AAV2 vector, but otherwise as in Figure 2. The histogram shows that the inhibition, specific for fondaparinux, is not shared by equimolar treatments with sucrose. Viability was assayed by trypan blue exclusion, counted by hand.

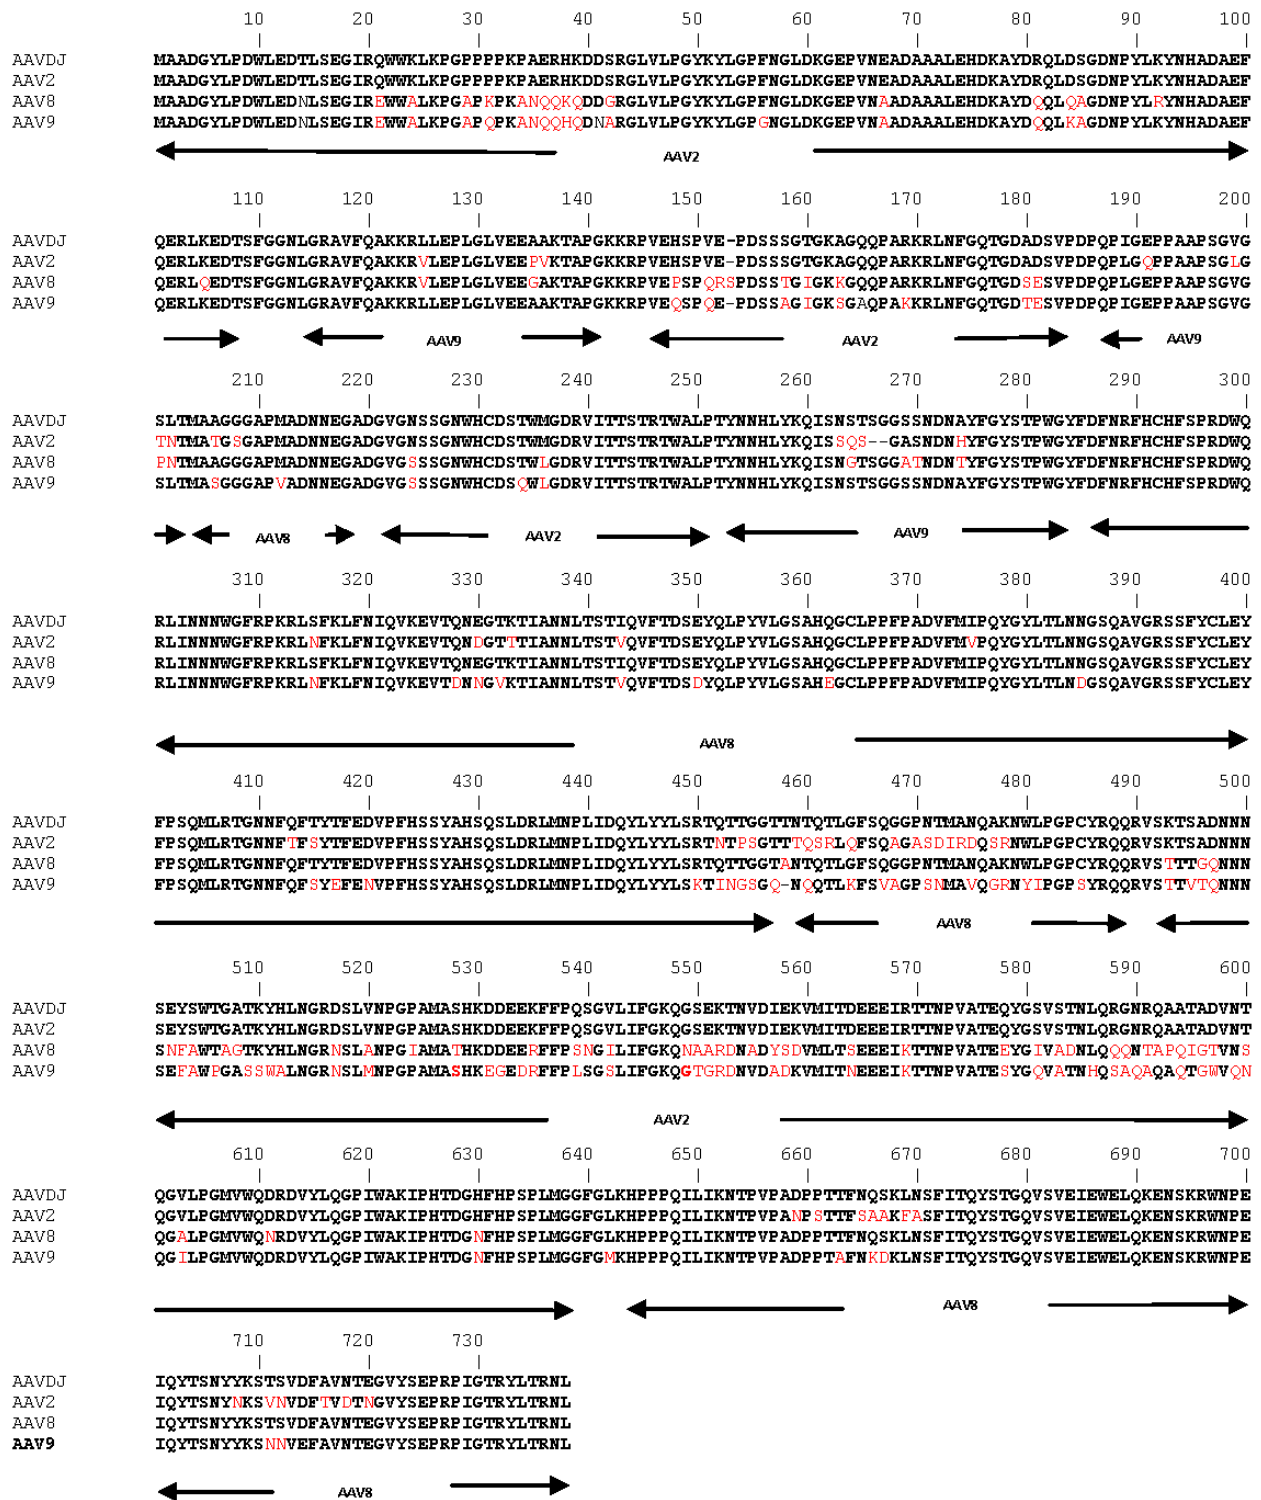

Figure S2: Sequence and structural alignment of AAV-DJ with its parental strains. Residues differing in amino acid type from AAV-DJ are shown in red. In places, the absence of sequence

differences uniquely defines the parental origin, but in other regions of higher serotype sequence identity, the designation (shown with arrows under the sequences) is ambiguous, so a parsimonious choice has been made that minimizes the number of sequence cross-overs, and gives have closest  $C_{\alpha}$  alignment, in the 3D structures.

**Supplemental Table**

| Serotype | Antibody | Neutralizing     | Mapping                   | Resolution | Citation |
|----------|----------|------------------|---------------------------|------------|----------|
| AAV-1    | ADK1a    | Yes              | <i>Cryo-EM</i>            | 11 Å       | (1)      |
|          | ADK1b    | Yes              | <i>Cryo-EM</i>            | 11 Å       | (1)      |
|          | 4E4      | Yes              | <i>Cryo-EM</i>            | 12 Å       | (2)      |
|          | 5H7      | Yes              | <i>Cryo-EM</i>            | 23 Å       | (2)      |
| AAV-2    | A20      | Yes              | <i>Cryo-EM</i>            | 8.5 Å      | (3)      |
|          |          |                  | Site-directed mutagenesis |            | (4)      |
|          |          |                  | Peptide insertion         |            | (5)      |
|          |          |                  | Peptide scanning          |            | (6)      |
|          | C37B     | Yes              | <i>Cryo-EM</i>            | 11 Å       | (2)      |
|          |          |                  | Peptide insertion         |            | (5)      |
|          | D3       | No               | Peptide scanning          |            | (6)      |
| C24B     | Yes      | Peptide scanning |                           | (6)        |          |
| AAV-5    | ADK5a    | No               | <i>Cryo-EM</i>            | 11 Å       | (1)      |
|          | ADK5b    | Yes              | <i>Cryo-EM</i>            | 12 Å       | (1)      |
|          | 3C5(B)   | No               | <i>Cryo-EM</i>            | 15 Å       | (2)      |
| AAV-6    | 5H7      | Yes              | <i>Cryo-EM</i>            | 15 Å       | (2)      |
| AAV-8    | ADK8     | Yes              | <i>Cryo-EM</i>            | 19 Å       | (7)      |
|          |          |                  | Site-directed mutagenesis |            | (7)      |
|          |          |                  | Peptide insertion         |            | (7)      |

## References

1. **Tseng YS, Gurda BL, Chipman P, McKenna R, Afione S, Chiorini JA, Muzyczka N, Olson NH, Baker TS, Kleinschmidt J, Agbandje-McKenna M.** 2015. Adeno-associated virus serotype 1 (AAV1)- and AAV5-antibody complex structures reveal evolutionary commonalities in parvovirus antigenic reactivity. *J Virol* **89**:1794-1808.
2. **Gurda BL, DiMattia MA, Miller EB, Bennett A, McKenna R, Weichert WS, Nelson CD, Chen WJ, Muzyczka N, Olson NH, Sinkovits RS, Chiorini JA, Zolotutkhin S, Kozyreva OG, Samulski RJ, Baker TS, Parrish CR, Agbandje-McKenna M.** 2013. Capsid antibodies to different adeno-associated virus serotypes bind common regions. *J Virol* **87**:9111-9124.
3. **McCraw DM, O'Donnell JK, Taylor KA, Stagg SM, Chapman MS.** 2012. Structure of adeno-associated virus-2 in complex with neutralizing monoclonal antibody A20. *Virology* **431**:40-49.
4. **Lochrie MA, Tatsuno GP, Christie B, McDonnell JW, Zhou S, Surosky R, Pierce GF, Colosi P.** 2006. Mutations on the external surfaces of adeno-associated virus type 2 capsids that affect transduction and neutralization. *J Virol* **80**:821-834.
5. **Huttner NA, Girod A, Perabo L, Edbauer D, Kleinschmidt JA, Buning H, Hallek M.** 2003. Genetic modifications of the adeno-associated virus type 2 capsid reduce the affinity and the neutralizing effects of human serum antibodies. *Gene Ther* **10**:2139-2147.
6. **Wobus CE, Hugle-Dorr B, Girod A, Petersen G, Hallek M, Kleinschmidt JA.** 2000. Monoclonal antibodies against the adeno-associated virus type 2 (AAV-2) capsid: epitope mapping and identification of capsid domains involved in AAV-2-cell interaction and neutralization of AAV-2 infection. *J Virol* **74**:9281-9293.
7. **Gurda BL, Raupp C, Popa-Wagner R, Naumer M, Olson NH, Ng R, McKenna R, Baker TS, Kleinschmidt JA, Agbandje-McKenna M.** 2012. Mapping a neutralizing epitope onto the capsid of Adeno-associated virus serotype 8. *J Virol* doi:10.1128/JVI.00218-12.
